# Supplementary material
Source: PubMed Central journal article supplement (PMC5154748)
Supplement: NIHMS831243-supplement-Table_information.pdf [file NIHMS831243-supplement-Table_information.pdf]

Antibiotic failure mediated by a resistant subpopulation in *Enterobacter cloacae*

Victor I. Band<sup>1,2,\*</sup>, Emily K. Crispell<sup>1,2,\*</sup>, Brooke A. Napier<sup>1,2</sup>, Carmen M. Herrera<sup>3</sup>, Greg K. Tharp<sup>4</sup>, Kranthi Vavikolanu<sup>5</sup>, Jan Pohl<sup>6</sup>, Timothy D. Read<sup>5,7,8</sup>, Steven E. Bosinger<sup>1,2,4</sup>, M. Stephen Trent<sup>3</sup>, Eileen M. Burd<sup>5,7,9</sup>, David S. Weiss<sup>2,5,7,10,†</sup>

<sup>1</sup>Department of Microbiology and Immunology, Emory University, Atlanta, GA 30329, USA

<sup>2</sup>Emory Vaccine Center, Atlanta, GA 30329, USA

<sup>3</sup>Department of Infectious Disease, College of Veterinary Medicine, University of Georgia, Athens, Georgia, USA

<sup>4</sup>Non-Human Primate Genomics Core, Yerkes National Primate Research Center, Robert W. Woodruff Health Sciences Center, Emory University, Atlanta, GA 30322, USA

<sup>5</sup>Division of Infectious Diseases, Department of Medicine, Emory University School of Medicine, Atlanta, GA, USA

<sup>6</sup>Biotechnology Core Facility Branch, Centers for Disease Control, Atlanta, GA 30333, USA.

<sup>7</sup>Emory Antibiotic Resistance Center, Atlanta, GA 30329, USA

<sup>8</sup>Department of Human Genetics, Emory University School of Medicine, Atlanta, Georgia, 30322, USA

<sup>9</sup>Department of Pathology and Laboratory Medicine, Emory University, Atlanta, GA, USA

<sup>10</sup>Research Service, Atlanta VA Medical Center, Decatur, GA, USA

\*These authors contributed equally. †Corresponding author

954 Gatewood Road, Atlanta, GA 30329, USA.

Tel: +1-404-727-8214, Fax: +1-404-727-8199, E-mail: [david.weiss@emory.edu](mailto:david.weiss@emory.edu)

## SI Guide

1. Supplementary Figures; Supplementary Legends (Supplementary Info.pdf)  
Contains 24 Supplementary Figures and their legends, with each legend immediately after the corresponding figure. The file also includes a title page.
2. Supplementary Tables (Supplementary Table.xls)  
Contains 4 Supplementary Tables, including the RNAseq data, the differentially expressed genes from RNAseq, known *phoQ*-regulated genes from RNAseq, and the primers used for bacterial cloning. Each table is in the same file, in a different Excel worksheet.
